# Supplementary material for: Time-pH and time-humidity scaling of ionic conductivity spectra of polyelectrolyte multilayers
Source: Royal Society of Chemistry journal article supplement (doi:10.1039/d4cp03482a), 2024-01-01
Supplement: d4cp03482a1.pdf [file d4cp03482a1.pdf]

## *Electronic Supplementary Information (ESI) for*

# **Time-pH and Time-Humidity Scaling of Ionic Conductivity Spectra of Polyelectrolyte Multilayers**

Jannis Schlicke, Cornelia Cramer and Monika Schönhoff

Institute of Physical Chemistry, University of Münster, Corrensstraße 28/30, 48149 Münster, Germany and Center for Soft Nanoscience, Busso-Peuss-Str. 10, 48149 Münster, Germany.

### **Relative Humidity via Saturated Salt Solutions**

Table S1 shows the saturated salt solutions and the relative humidity values achieved as well as the literature values utilized during the Time-Humidity superposition studies.

**Table S1:** Relative humidity adjusted via saturated salt solutions. Both literature values as well as the experimental conditions are listed considering an error of 2 %, which is based on overall standard deviations.

| <b>Salt</b>         | <b>Equilibrium relative humidity</b> | <b>Literature Value (25 °C)<sup>1-3</sup></b> |
|---------------------|--------------------------------------|-----------------------------------------------|
| Lithium chloride    | (8 ± 2) %                            | 11.3 % <sup>1,3</sup>                         |
| Potassium acetate   | (22 ± 2) %                           | 22.2 % <sup>1,3</sup>                         |
| Magnesium chloride  | (32 ± 2) %                           | 32.7 % <sup>1,3</sup>                         |
| Potassium Carbonate | (48 ± 2) %                           | 43 % <sup>3</sup>                             |
| Magnesium nitrate   | (54 ± 2) %                           | 52.8 % <sup>1</sup>                           |
| Ammonium nitrate    | (63 ± 2) %                           | 63 % <sup>2</sup>                             |
| Sodium chloride     | (79 ± 2) %                           | 75 % <sup>1,3</sup>                           |
| Potassium Sulfate   | (99 ± 2) %                           | 97.3 % <sup>1,3</sup>                         |

## Time-RH Superposition

The evaluation of humidity-dependent conductivity spectra of (PDADMA/PAA)<sub>n</sub> PEMs reveals the applicability of superposition principle. Apart from samples prepared from water adjusted to pH 4 (Figure 2), samples prepared from 0.1 M LiCl solutions adjusted to pH 6 and 7.5 were investigated (Figure S1). According to previous findings<sup>4</sup> these samples are more likely to feature extrinsic charge compensation. Accordingly, significant deviations from Summerfield-type scaling are observed (Figure 5). This might indicate a varying charge carrier density.

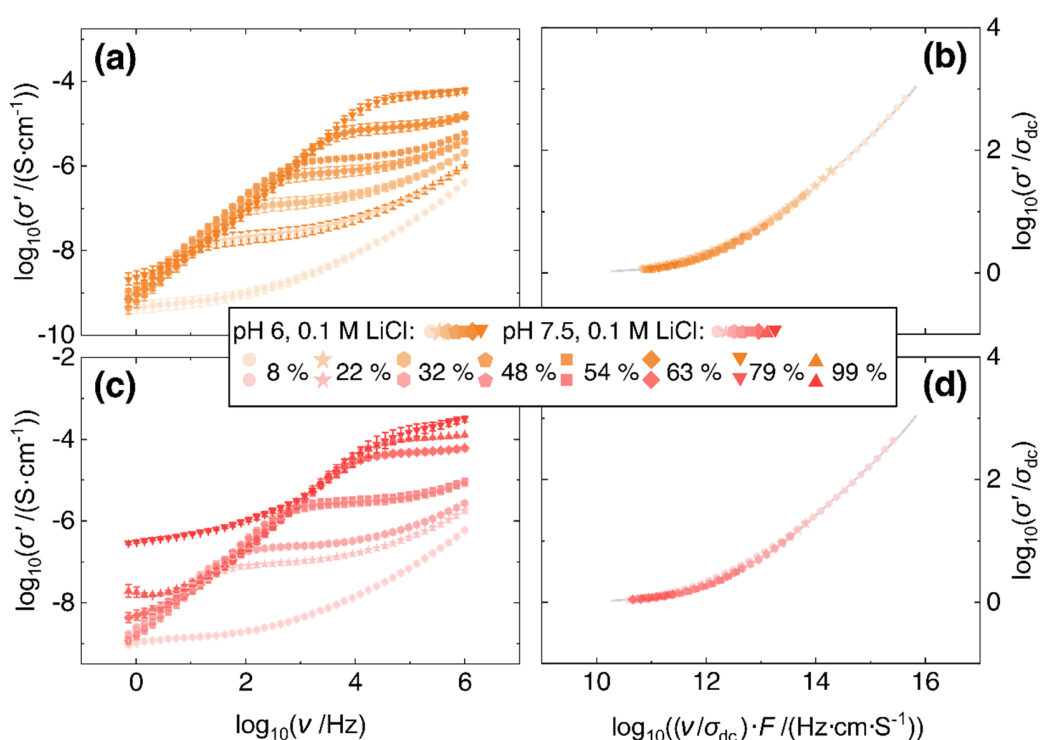

**Figure S1:** Time-humidity superposition of conductivity spectra of (PDADMA/PAA)<sub>n</sub> PEMs. Spectra obtained for different preparation pH and humidity are shifted with respect to the spectrum for samples prepared at pH 4 and measured at the lowest observed relative humidity. (a) and (b): Data for samples prepared from 0.1 M LiCl solutions at pH 6 measured at different relative humidity. (c) and (d): Data for samples prepared from 0.1 M LiCl solutions at pH 7.5 measured at different relative humidity.

## References

1. Rockland, L. B., *Anal. Chem.*, 1960, **32 (10)**, 1375-1376.
2. Young, J. F., *J. Appl. Chem.* 1967, **17 (9)**, 241-245.
3. Greenspan, L., *J. Res. Natl. Bur. Stand. A*, 1977, **81 (1)**, 89
4. Schlicke, J.; Hoffmann, K.; Lorenz, M.; Schönhoff, M.; Cramer, C., *J. Phys. Chem. C*, 2020, **124 (31)**, 16773-16783.
